# Supplementary material for: Climatic controls on water vapor deuterium excess in the marine boundary layer of the North Atlantic based on 500 days of in situ, continuous measurements
Source: Copernicus journal article supplement (doi:10.5194/acp-14-7741-2014), 2014-08-04

Supplement of Atmos. Chem. Phys., 14, 7741–7756, 2014  
<http://www.atmos-chem-phys.net/14/7741/2014/>  
doi:10.5194/acp-14-7741-2014-supplement  
© Author(s) 2014. CC Attribution 3.0 License.

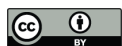

*Supplement of*

## **Climatic controls on water vapor deuterium excess in the marine boundary layer of the North Atlantic based on 500 days of in situ, continuous measurements**

**H. C. Steen-Larsen et al.**

*Correspondence to:* H. C. Steen-Larsen (hanschr@gfy.ku.dk)

**Supplementary material:**

The relation between d-excess and RH at SST for different wind speeds divided into four different bins (below 3 m/s, between 3 and 5 m/s, between 7 and 9 m/s, and above 9 m/s).

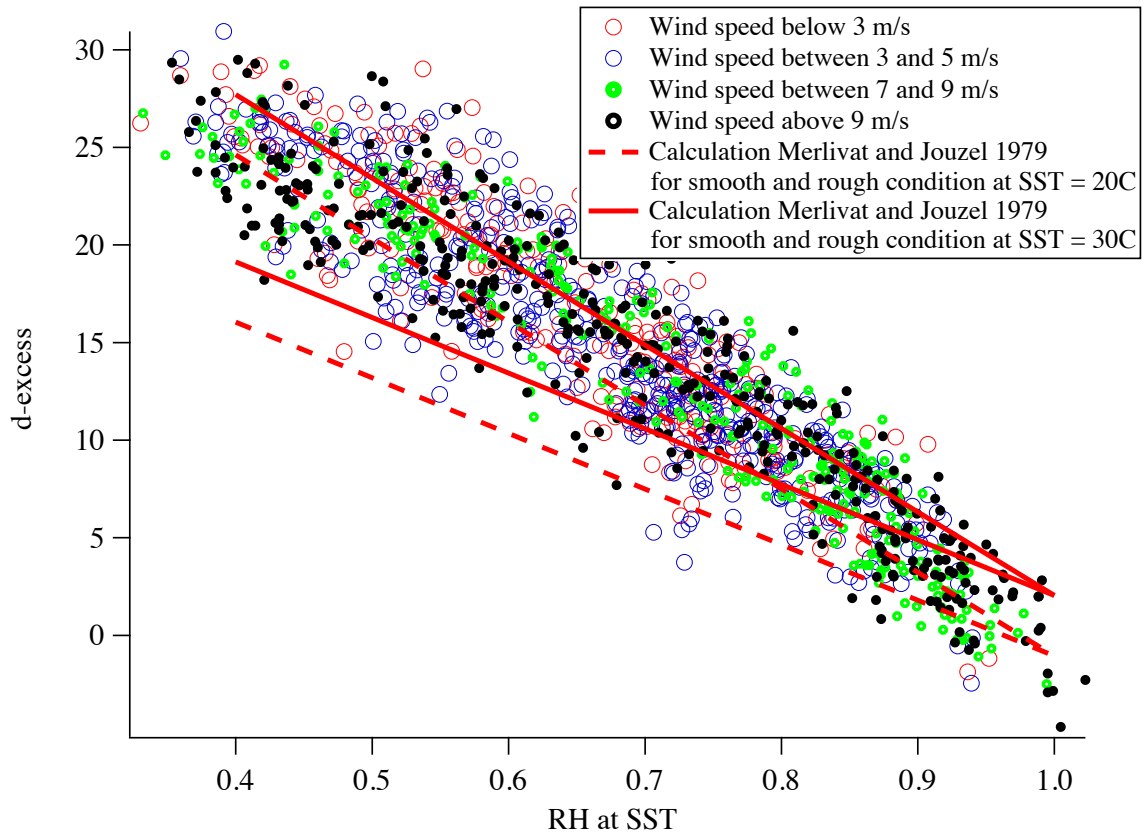

Supplement: Supplementary file 1 [file acp-14-7741-2014-supplement.pdf]
